# Supplementary material for: A Transfectable Fusagravirus from a Japanese Strain of Cryphonectria carpinicola with Spherical Particles
Source: MDPI journal article supplement (doi:10.3390/v14081722), 2022-08-04
Supplement: s1 [file s1]

## SUPPLEMENTARY DATA FOR

### **A transfectable fusagravirus from a Japanese strain of *Cryphonectria carpinicola* with spherical particles**

Subha Das<sup>1,2,†</sup>, Sakae Hisano<sup>1,†</sup>, Ana Eusebio-Cope<sup>1,3</sup>, Hideki Kondo<sup>1</sup>, and Nobuhiro Suzuki<sup>1,\*</sup>

<sup>1</sup>Institute of Plant Science and Resources, Okayama University, Kurashiki, Okayama 710-0046<sup>1</sup>), Japan

Short title: A novel transfectable fusagravirus from *Cryphonectria carpinicola*

†These authors contributed equally to this work.

\* Correspondence may be sent to N. Suzuki

Institute of Plant Science and Resources, Okayama University

Chuou 2-20-1, Kurashiki, JAPAN

Telephone: 81-86-434-1230

FAX: 81-86-434-1232

E-mail: nsuzuki@okayama-u.ac.jp

Supplementary tables: 3

Supplementary figure: 1

## Supplementary Figure S1. Mascot search results of CcFGV1 structural proteins of 150 kDa and 100 kDa.

### Match to CcFGV1 ORF1: Score: 927

Found in search of 200519\_JS13-150kDa-long.mgf

Calculated pI value: 6.82

NCBI BLAST search of [JS13ORF1](#) against nr

Unformatted [sequence string](#) for pasting into other applications

Fixed modifications: Carbamidomethyl (C)

Cleavage by Trypsin: cuts C-term side of KR unless next residue is P Sequence Coverage: 22%

### Match to CcFGV1 ORF1: Score: 1634

Found in search of 200519\_JS13-100kDa-long.mgf

Nominal mass ( $M_r$ ): ; Calculated pI value: 6.82

NCBI BLAST search of [JS13ORF1](#) against nr

Unformatted [sequence string](#) for pasting into other applications

Fixed modifications: Carbamidomethyl (C)

Cleavage by Trypsin: cuts C-term side of KR unless next residue is P Sequence Coverage: 22%

MASSSSSRSAARTLNEQISSLPTRPILQGEVVPSQPNGLCYLNFFHPASHSLFDKTRVWEKP  
AEIVQHAISVGAVLVADQKFSVQLGGQYLRKLSSSGPSIEYAHVARSGSWTPAQILSAECF  
AETRFGGESHSTGLAPMILSLLLSFFLFIGTAVGGYLWAWQPAHYSSPPNYGPGSCYLVYF  
HPLVRPFAFALLGLRPRLWSVRLLALVLPTVSETNLMVQKAFTLADGTAVYHVTACTGGSW  
AGFGPRMSLASLDPSARLGQFSPSPEDQVIETK**DAPVAKAVTGVPSLQSLGGVRQVPTSLP**  
**VPQISPGFQ**RWSPSTFPASLTSENLVWEHSEHGHLAVKRVSEFVRHFPE**SAISRLPQRF**  
**AETLLVK**WFAR**RDCNEASTVPASYR****SFDRDIVQ**RTVLDEFSSIGQVLDNNLTLDVLK**DAD**  
**SSAAYS**RGLGSRNQRL**LVPGWEAAVMTRWLRFRDFATR**SASAR**SYKEFVFR**LASRFTLATAA  
QDIVNSVPDYATHVADTATDVQIIHLNADPIIPAPVAGQPPPPVWGEAQLWDPAMIQALV  
DGR**AQLIDAEGFTK**EEIAQIIIGCLAPSGAGNVPILRSVVPDPATPDATEDVDMLPACARF  
TYPNGVTHIIVHHGNSAIPDQADQQWIAAHAFDFPSLAILATVMRTYATR**HALEDLFK**WAF  
EAVAYR**TAFYTAADALGAR**HDLHSDLLISAQGASELHLPRNVTGSAYFDFTFFAPVQVTGDL  
EMYLYATPQQLVTSATLASHCR**AVALAWACKSGSLLGLSFTR**AAAR**QNQFTR**NQQDKWLRM  
YYGELNIFSAHANAMGFQYGFAPSALVRR**TEGGLLPDWWK**NYVAPTLVNHYLELWAMQSI  
PTFQVLPYYDATAKTSHVQWPEDTPDSTAALPSFNTERKVRLAREFSPLTGHSWLGDGGAE  
YNAQFYAAGADGR**FAYEGAEPKANFSSWTGT**FARSFPST**PAAARGISLTNGRL**GEAFSDF  
ILPGSFISYRVASDK**VINWGVNQIDDRALNNSEVRRWWLASK**GAAHTSLMVNYVSPISQHY  
ELDDFADYSVTLWEKEGR**FAALSFGPLPRLAPDTFDPVNITRDQSAFNLRFDSKPYALDQ**  
**LSTSR**ITHNAR**SDVPASGPQTKYTPAEVNARVAAAISRRNRPSGQVSYQAK**NPIFADQLP  
HLNDYSVDVREEGLDFSRPNENSGALPAQDETSSDRLR**QIQEAEAR**LDNAFQEYMADQQQK  
RAIRQARVAHVQPTFTFPVPIHAPIPQRRR**RLPTVTDNGPPVPVSVVPSR**HKGHMTYSANRP  
LQQQAPPVVPNDAAAASVQQMSVNLAEQRRRASLTPTLAGPNRRRAASPRARYLSKRNEA  
GQPTARFGDVVHMHHIKEQDAPPTVSSPKPGEPLPDLWSAQPPFLTNQQPPDPAQALPPQ  
PTEEEYPRLANRARPSSAPEQVDFSQIDWDHGSGDAR**AQMLEEFSR**KAHQHVDMTKPKN

**Blue:** Fragments from the 100kDa protein

**Red:** Fragments from the 150kDa protein

**Purple:** Fragments from both 100 and 150kDa protein

**Underlined:** N-terminally sequenced residues of the 150kDa protein

**Supplementary Table S1. List of primers used in this study.**

| Primer Name     | Sequence                                | CcFGV1 map position | Used in               |
|-----------------|-----------------------------------------|---------------------|-----------------------|
| JS13-V-ctg1-5R  | TGGATCCTGGGTCATGAGTGATGA                | 5927 < 5950         | RT-PCR                |
| JS13-V-ctg1-3F  | TTGGACACTTACGTGCGATCTCTC                | 9294 > 9317         | RT-PCR                |
| JS13-V-ctg2-5R  | CAAGCAAGTGCAACTGCGCG                    | 3432 < 3451         | RT-PCR                |
| JS13-V-ctg2-3F  | CACATCAAGGAACAGGACGCTCC                 | 5241 > 5263         | RT-PCR                |
| JS13-V-ctg3-5R  | CCGGGTGTTCCACACCAGGGCCATAACT            | 259 < 286           | RT-PCR                |
| JS13-V-ctg3-3F  | TCTACGTTCCCGCTTCTCTCACATCTG             | 2129 > 2156         | RT-PCR                |
| JS13-V-RACE-5R  | CACACAGGACAGATCTTGCCT                   | 579 < 599           | RACE                  |
| JS13-V-RACE-3F  | CATAGCTATAATGCTTCAACGGCCC               | 9125 > 9149         | RACE                  |
| 3RACE-adaptor   | PO4-CAATACCTTCTGACCATGCAGTGACAGTCAGCATG |                     | RACE                  |
| 3RACE-1st       | CATGCTGACTGTCACTGCAT                    |                     | RACE                  |
| 3RACE-2nd       | TGCATGGTCAGAAGGTATTG                    |                     | RACE                  |
| JS13-V-Plobe-5F | GAGGCCGCGAGAGATCTGAAA                   | 7502 > 7522         | DIG-probe preparation |
| JS13-V-Plobe-3R | CGGCAAGGGGTTGGAGAAGAA                   | 7961 < 7981         | DIG-probe preparation |

**Supplementary Table S2. BLASTp search with the CcFGV1 ORF1-encoded protein.**

| Description (virus [isolate])                         | Description (protein)           | Max score | Total score | Query cover | E value   | Identity | Accession      |
|-------------------------------------------------------|---------------------------------|-----------|-------------|-------------|-----------|----------|----------------|
| [Cryphonectria naterciae fusagravirus 1]              | putative structural/gag protein | 1329      | 1329        | 88%         | 0         | 54.31    | UDM59940.1     |
| [Fusarium virguliforme dsRNA mycovirus 2]             | putative structural/gag protein | 904       | 904         | 71%         | 0         | 46.75    | AEZ54145.1     |
| [Fusarium virguliforme dsRNA mycovirus 1]             | putative structural/gag protein | 893       | 893         | 72%         | 0         | 45.57    | AEZ54147.1     |
| [Trichoderma atroviride mycovirus]                    | putative structural/gag protein | 753       | 753         | 73%         | 0         | 39.46    | YP_009342054.1 |
| [Macrophomina phaseolina fusagravirus 2]              | hypothetical protein            | 440       | 440         | 71%         | 3.00E-127 | 30.84    | QKO02083.1     |
| [Macrophomina phaseolina fusagravirus 1]              | hypothetical protein            | 431       | 431         | 63%         | 3.00E-123 | 32.29    | QDM35289.1     |
| [Macrophomina phaseolina fusagravirus 4]              | hypothetical protein            | 423       | 423         | 64%         | 3.00E-121 | 32.74    | QKO02087.1     |
| [Macrophomina phaseolina fusagravirus 5]              | hypothetical protein            | 421       | 421         | 64%         | 1.00E-120 | 32.40    | QKO02089.1     |
| [Trichoderma asperellum dsRNA virus 1]                | hypothetical protein            | 421       | 421         | 82%         | 4.00E-119 | 27.93    | YP_009553632.1 |
| [Macrophomina phaseolina double-stranded RNA virus 2] | hypothetical protein            | 416       | 416         | 64%         | 5.00E-119 | 32.12    | ALD89096.1     |
| [Fusarium poae dsRNA virus 2]                         | hypothetical protein            | 414       | 414         | 64%         | 3.00E-117 | 30.13    | YP_009253994.1 |
| [Macrophomina phaseolina fusagravirus 3]              | hypothetical protein            | 402       | 402         | 64%         | 7.00E-114 | 31.77    | QKO02085.1     |
| [Botrytis cinerea RNA virus 1]                        | hypothetical protein            | 397       | 397         | 66%         | 3.00E-112 | 31.74    | YP_009115497.1 |
| [Sclerotinia sclerotiorum fusagravirus 1]             | hypothetical protein            | 392       | 392         | 65%         | 2.00E-110 | 29.93    | QUE49099.1     |
| [Botrytis cinerea RNA virus 1]                        | hypothetical protein            | 390       | 390         | 66%         | 9.00E-110 | 31.80    | QOL11121.1     |
| [Grapevine associated totivirus-2]                    | hypothetical protein            | 388       | 388         | 66%         | 7.00E-109 | 30.81    | ADO60932.1     |
| [Sclerotinia sclerotiorum dsRNA mycovirus-L-WX1]      | hypothetical protein            | 384       | 384         | 63%         | 1.00E-107 | 31.15    | QUE49144.1     |
| [Sclerotinia sclerotiorum dsRNA mycovirus-L-WX2]      | hypothetical protein            | 381       | 381         | 59%         | 2.00E-106 | 31.56    | QUE49182.1     |
| [Sclerotinia sclerotiorum dsRNA mycovirus-L]          | hypothetical protein            | 377       | 377         | 65%         | 2.00E-105 | 30.40    | YP_006331064.1 |
| [Fusarium poae mycovirus 1]                           | hypothetical protein            | 375       | 375         | 61%         | 3.00E-104 | 30.41    | YP_009272908.1 |
| [Fusarium poae dsRNA virus 3]                         | hypothetical protein            | 374       | 374         | 65%         | 7.00E-104 | 29.12    | YP_009253996.1 |

|                                             |                             |     |     |     |           |       |                |
|---------------------------------------------|-----------------------------|-----|-----|-----|-----------|-------|----------------|
| [Rosellinia necatrix fusagravirus 1]        | hypothetical protein        | 372 | 372 | 69% | 9.00E-103 | 29.37 | BBB86777.1     |
| [Phomopsis viticola mycovirus 961]          | hypothetical protein        | 363 | 363 | 63% | 3.00E-101 | 28.87 | QWE35565.1     |
| [Rosellinia necatrix fusagravirus 1]        | hypothetical protein        | 365 | 365 | 59% | 3.00E-100 | 30.26 | AVD68672.2     |
| [Sclerotinia sclerotiorum fusagravirus 2]   | hypothetical protein        | 356 | 356 | 65% | 5.00E-98  | 30.48 | QUE49101.1     |
| [Fusarium graminearum dsRNA mycovirus-3]    | hypothetical protein        | 332 | 332 | 60% | 2.00E-89  | 29.33 | YP_003288788.1 |
| [Monilinia virus D]                         | hypothetical protein        | 249 | 249 | 40% | 2.00E-65  | 32.25 | QED42929.1     |
| [Caloscypha fulgens fusagravirus 1]         | structural protein          | 191 | 191 | 50% | 9.00E-45  | 26.06 | QUP79365.1     |
| [Monilinia virus E]                         | hypothetical protein        | 138 | 138 | 25% | 2.00E-29  | 28.00 | QED43011.1     |
| [Sclerotium rolfsii RNA virus 1]            | hypothetical protein        | 139 | 139 | 30% | 4.00E-29  | 24.85 | AZF86101.1     |
| [Streptobotrys caulophylli fusagravirus 1]  | hypothetical protein        | 135 | 135 | 44% | 1.00E-27  | 24.43 | UBQ34674.1     |
| [Rosellinia necatrix mycovirus]             | structural/gag protein      | 135 | 135 | 43% | 1.00E-27  | 24.43 | QMU26428.1     |
| [Rosellinia necatrix fusagravirus 3]        | putative structural protein | 133 | 133 | 51% | 6.00E-27  | 24.24 | BBB86784.1     |
| [Bremia lactucae associated fusagravirus 1] | ORF2                        | 129 | 129 | 55% | 1.00E-25  | 25.26 | QIP68010.1     |
| [Rosellinia necatrix fusagravirus 2]        | putative structural protein | 117 | 117 | 23% | 4.00E-22  | 29.16 | BBB86782.1     |
| [Phlebiopsis gigantea mycovirus dsRNA 2]    | hypothetical protein        | 106 | 106 | 28% | 1.00E-18  | 24.28 | CAJ34334.2     |
| [Papaya meleira virus]                      | coat protein                | 100 | 100 | 48% | 1.00E-16  | 20.37 | AMU19319.1     |
| [Picoa juniperi mycovirus 1]                | hypothetical protein        | 72  | 72  | 28% | 5.00E-08  | 20.71 | QOI17265.1     |

**Supplementary Table S3. BLASTP search with CcFGV1 ORF2-encoded RdRP.**

| Description (virus [isolate])                         | Description (protein)        | Max score | Total score | Query cover | E value   | Identity | Accession      |
|-------------------------------------------------------|------------------------------|-----------|-------------|-------------|-----------|----------|----------------|
| [Cryphonectria naterciae fusagravirus 1]              | RNA-dependent RNA polymerase | 1071      | 1071        | 91%         | 0         | 45.83    | UDM59941.1     |
| [Fusarium virguliforme dsRNA mycovirus 1]             | RNA-dependent RNA polymerase | 767       | 767         | 96%         | 0         | 36.74    | AEZ54148.1     |
| [Fusarium virguliforme dsRNA mycovirus 2]             | RNA-dependent RNA polymerase | 760       | 760         | 98%         | 0         | 36.54    | AEZ54146.1     |
| [Trichoderma atroviride mycovirus]                    | RNA-dependent RNA polymerase | 710       | 710         | 91%         | 0         | 35.55    | YP_009342055.1 |
| [Macrophomina phaseolina fusagravirus 1]              | RNA-dependent RNA polymerase | 587       | 587         | 93%         | 0         | 33.15    | QDM35290.1     |
| [Trichoderma asperellum dsRNA virus 1]                | RNA-dependent RNA polymerase | 560       | 560         | 95%         | 7.00E-173 | 31.12    | YP_009553633.1 |
| [Macrophomina phaseolina fusagravirus 3]              | RNA-dependent RNA polymerase | 553       | 553         | 95%         | 3.00E-170 | 31.16    | QKO02086.1     |
| [Macrophomina phaseolina fusagravirus 2]              | RNA-dependent RNA polymerase | 548       | 548         | 94%         | 6.00E-169 | 31.66    | QKO02084.1     |
| [Sclerotinia sclerotiorum dsRNA mycovirus-L-WX2]      | RNA-dependent RNA polymerase | 541       | 541         | 91%         | 2.00E-165 | 32.62    | QUE49183.1     |
| [Macrophomina phaseolina fusagravirus 4]              | RNA-dependent RNA polymerase | 536       | 536         | 87%         | 6.00E-165 | 32.06    | QKO02088.1     |
| [Sclerotinia sclerotiorum dsRNA mycovirus-L]          | RNA-dependent RNA polymerase | 539       | 539         | 91%         | 1.00E-164 | 32.37    | YP_006331065.1 |
| [Sclerotinia sclerotiorum dsRNA mycovirus-L-WX1]      | RNA-dependent RNA polymerase | 534       | 534         | 91%         | 5.00E-163 | 31.83    | QUE49145.1     |
| [Macrophomina phaseolina double-stranded RNA virus 2] | RNA-dependent RNA polymerase | 526       | 526         | 78%         | 1.00E-162 | 33.30    | ALD89097.1     |
| [Macrophomina phaseolina fusagravirus 5]              | RNA-dependent RNA polymerase | 525       | 525         | 78%         | 5.00E-162 | 33.05    | QKO02090.1     |
| [Sclerotinia sclerotiorum dsRNA mycovirus-L]          | RNA-dependent RNA polymerase | 526       | 526         | 91%         | 9.00E-160 | 32.18    | CEZ26307.1     |
| [Rosellinia necatrix fusagravirus 1]                  | RNA-dependent RNA polymerase | 522       | 522         | 98%         | 1.00E-158 | 29.58    | BBB86778.1     |
| [Sclerotinia sclerotiorum fusagravirus 2]             | RNA-dependent RNA polymerase | 521       | 521         | 90%         | 4.00E-158 | 31.62    | QUE49102.1     |
| [Rosellinia necatrix fusagravirus 1]                  | replicase                    | 519       | 519         | 98%         | 2.00E-157 | 29.68    | AZG06258.1     |
| [Botrytis cinerea RNA virus 1]                        | RNA-dependent RNA polymerase | 516       | 516         | 99%         | 4.00E-156 | 31.42    | YP_009115498.1 |
| [Sclerotinia sclerotiorum dsRNA mycovirus-L]          | RNA dependent RNA polymerase | 509       | 509         | 91%         | 1.00E-153 | 31.16    | CEZ26308.1     |

|                                                |                                       |     |     |     |           |       |                |
|------------------------------------------------|---------------------------------------|-----|-----|-----|-----------|-------|----------------|
| [Fusarium poae dsRNA virus 3]                  | RNA-dependent RNA polymerase          | 486 | 486 | 84% | 5.00E-145 | 32.83 | YP_009253997.1 |
| [Fusarium graminearum dsRNA mycovirus-3]       | putative RNA-dependent RNA polymerase | 460 | 460 | 91% | 8.00E-136 | 31.03 | YP_003288789.1 |
| [Fusarium poae mycovirus 1]                    | RNA-dependent RNA polymerase          | 461 | 461 | 84% | 1.00E-135 | 31.17 | YP_009272909.1 |
| [Fusarium poae dsRNA virus 2]                  | RNA-dependent RNA polymerase          | 457 | 457 | 98% | 3.00E-134 | 29.00 | YP_009253995.1 |
| [Rosellinia necatrix fusagravirus 3]           | RNA-dependent RNA polymerase          | 327 | 327 | 65% | 5.00E-89  | 30.96 | BBB86785.2     |
| [Rosellinia necatrix fusagravirus 2]           | RNA-dependent RNA polymerase          | 322 | 322 | 46% | 1.00E-87  | 34.57 | BBB86783.1     |
| [Phlebiopsis gigantea mycovirus dsRNA 2]       | putative RNA-dependent RNA polymerase | 311 | 311 | 45% | 5.00E-84  | 34.02 | CAJ34335.2     |
| [Picoa juniperi mycovirus 2]                   | RNA-dependent RNA polymerase          | 291 | 291 | 47% | 5.00E-78  | 33.44 | QOI17268.1     |
| [Diplodia scrobiculata RNA virus 1]            | RNA-dependent RNA polymerase          | 263 | 263 | 46% | 6.00E-68  | 31.26 | YP_003359178.1 |
| [Papaya meleira virus]                         | RNA-dependent RNA polymerase          | 247 | 247 | 44% | 9.00E-63  | 30.87 | YP_009179230.1 |
| [Picoa juniperi mycovirus 1]                   | RNA-dependent RNA polymerase          | 235 | 235 | 53% | 4.00E-60  | 30.08 | QOI17266.1     |
| [Phytophthora infestans RNA virus 3]           | RNA dependent RNA polymerasee         | 236 | 236 | 45% | 1.00E-59  | 30.51 | YP_009551328.1 |
| [Papaya meleira virus]                         | RNA-dependent RNA polymerasee         | 226 | 226 | 42% | 6.00E-56  | 29.10 | AMU19320.1     |
| [Hubei toti-like virus 11]                     | hypothetical protein                  | 94  | 94  | 26% | 3.00E-15  | 25.14 | APG76021.1     |
| [Lotchka virus]                                | RNA-dependent RNA polymerase          | 94  | 94  | 36% | 3.00E-15  | 24.69 | QRW42119.1     |
| [Wuhan insect virus 28]                        | hypothetical protein 2                | 91  | 91  | 36% | 6.00E-14  | 25.50 | YP_009342430.1 |
| [Totiviridae sp.]                              | RNA-dependent RNA polymerase          | 86  | 86  | 27% | 1.00E-12  | 26.88 | UCD53716.1     |
| [Lotchka virus]                                | RNA-dependent RNA polymerase          | 86  | 86  | 36% | 1.00E-12  | 24.28 | QRW42121.1     |
| [Lotchka virus]                                | RNA-dependent RNA polymerasee         | 86  | 86  | 36% | 2.00E-12  | 24.28 | QRW42117.1     |
| [Rhizoctonia fumigata mycovirus]               | putative RNA-dependent RNA polymerase | 81  | 81  | 36% | 8.00E-11  | 26.24 | AJE29745.1     |
| [Persimmon latent virus]                       | RNA-dependent RNA polymerasee         | 72  | 72  | 28% | 4.00E-08  | 24.94 | YP_009025166.1 |
| [Sclerotinia sclerotiorum botybirnavirus 2]    | cap-pol fusion protein                | 66  | 66  | 21% | 2.00E-06  | 27.00 | AMT92139.1     |
| [Sclerotinia sclerotiorum botybirnavirus 2-WX] | cap-pol fusion protein                | 65  | 65  | 26% | 6.00E-06  | 25.66 | QUE49191.1     |

|                                                       |                              |    |    |     |          |       |                |
|-------------------------------------------------------|------------------------------|----|----|-----|----------|-------|----------------|
| [Plasmopara viticola lesion associated dsRNA virus 1] | RNA dependent RNA polymerase | 64 | 64 | 27% | 1.00E-05 | 24.40 | QGY93970.1     |
| [Rosellinia necatrix quadrivirus 1]                   | RNA dependent RNA polymerase | 57 | 57 | 22% | 9.00E-04 | 23.81 | BAM93353.1     |
| [Barrymore virus]                                     | RNA-dependent RNA polymerase | 57 | 57 | 26% | 0.001    | 25.46 | QED21514.1     |
| [Rosellinia necatrix quadrivirus 1]                   | RNA dependent RNA polymerase | 55 | 55 | 26% | 0.005    | 22.37 | YP_005097975.1 |
| [Spissistilus festinus virus 1]                       | RNA-directed RNA polymerase  | 53 | 53 | 26% | 0.021    | 25.67 | YP_003800001.1 |
